# Supplementary material
Source: PubMed Central journal article supplement (PMC7219602)
Supplement: NIHMS1549182-supplement-Supplemental_Material.pdf [file NIHMS1549182-supplement-Supplemental_Material.pdf]

## **SUPPLEMENTAL MATERIAL**

### **Supplemental Methods**

#### *Parameterization of Main Model*

The parameterization of the main model, which is a random intercept model or multi-level model, is outlined below. Covariates are not listed for clarity. *BP* represents the predictor of interest.

The Level 1 equation represents the repeated measures level, which allows us to estimate the expected mean log-transformed white matter hyperintensity volume for the  $i^{th}$  region for the  $j^{th}$  participant.  $\beta_{0j}$  represents the expected mean log-transformed white matter hyperintensity for the  $j^{th}$  participant.  $\beta_{1j}$  represents the effect of brain region on mean log-transformed white matter hyperintensity volume.  $e_{ij}$  represents the within-subject effect (deviation of an individual's log-transformed white matter hyperintensity volume from their individual-specific mean of overall log-transformed white matter hyperintensity volume).

The Level 2 equations allow us to estimate the expected mean log-transformed white matter hyperintensity for the  $j^{th}$  participant, where  $\gamma_{00}$  is the expected overall mean log-transformed white matter hyperintensity,  $\gamma_{01}$  is the expected effect of *BP* measure of interest, and  $r_{0j}$  is the random subject effect (deviation of an individual's expected mean log-transformed white matter hyperintensity from the population mean). We also specify an equation for  $\beta_{1j}$ , which allows us to specify a two-way interaction term between *BP* and region of interest in the combined equation.

The combined equation represents the parameterization of the simplest model (i.e. no covariates). The two-way interaction term between *BP* and region of interest allows us to examine whether the effect of *BP* measure on log-transformed white matter hyperintensity volume is different across regions of interest.

*Level 1 equation (repeated measures):*  $Y_{ij} = \beta_{0j} + \beta_{1j}(\text{region}_{ij}) + e_{ij}$

*Level 2 equations (person):*  $\beta_{0j} = \gamma_{00} + \gamma_{01}(BP_{ij}) + r_{0j}$   
 $\beta_{1j} = \gamma_{10} + \gamma_{11}(BP_{ij})$

*Combined equation:*  $Y_{ij} = \gamma_{00} + \gamma_{01}(BP_{ij}) + \gamma_{10}(\text{region}_{ij}) + \gamma_{11}(BP_{ij})(\text{region}_{ij}) + r_{0j} + e_{ij}$

#### *Model Selection Procedure*

| Step | Model Covariates                                                                                                                                                                                                   | Rationale                                                                                                                                  | Decision                                                                                                        |
|------|--------------------------------------------------------------------------------------------------------------------------------------------------------------------------------------------------------------------|--------------------------------------------------------------------------------------------------------------------------------------------|-----------------------------------------------------------------------------------------------------------------|
| 1    | age, sex, race/ethnicity, TIV, BMI, brain region, BP predictor of interest, smoking status, anti-hypertensive medication use, any physical activity, moderate alcohol consumption, diabetes, hyperlipidemia, years | Chose these covariates based on previous literature and previously published NOMAS papers. These are known covariates between BP and WMHV. | We are primarily concerned with the two-way interaction term between brain region and BP predictor of interest. |

|   |                                                                                                                                                                                                                                                                                                                                                                                                                                                                        |                                                                                                                                                                                                     |                                                                                                                                                                                                                  |
|---|------------------------------------------------------------------------------------------------------------------------------------------------------------------------------------------------------------------------------------------------------------------------------------------------------------------------------------------------------------------------------------------------------------------------------------------------------------------------|-----------------------------------------------------------------------------------------------------------------------------------------------------------------------------------------------------|------------------------------------------------------------------------------------------------------------------------------------------------------------------------------------------------------------------|
|   | between baseline and MRI and two-way interaction term between brain region and BP predictor of interest                                                                                                                                                                                                                                                                                                                                                                |                                                                                                                                                                                                     |                                                                                                                                                                                                                  |
| 2 | age, sex, race/ethnicity, TIV, BMI, brain region, BP predictor of interest, smoking status, anti-hypertensive medication use, any physical activity, moderate alcohol consumption, diabetes, hyperlipidemia, years between baseline and MRI and two-way interaction terms between all of the above and brain region                                                                                                                                                    | We are concerned about whether the other covariates might have differential associations with WMHV by region, so we added two-way interaction terms between all of the above and brain region.      | We kept two-way interaction terms that had a p-value<0.05. These covariates were: age, sex, race/ethnicity, TIV, anti-hypertensive medication use, smoking status, diabetes, and years between baseline and MRI. |
| 3 | age, sex, race/ethnicity, TIV, BMI, brain region, BP predictor of interest, smoking status, anti-hypertensive medication use, any physical activity, moderate alcohol consumption, diabetes, hyperlipidemia, years between baseline and MRI, two-way multiplicative interaction terms between brain region and age, sex, race/ethnicity, TIV, anti-hypertensive medication use, smoking status, diabetes, years between baseline and MRI, and BP predictor of interest | This model included our covariates of interest based on previous literature and work in NOMAS, as well as two-way interaction terms that were significant in a fully-adjusted model (Step 2 above). | This was our final model.                                                                                                                                                                                        |

### *Covariate Measurement*

We chose known confounders of the association of interest *a priori* as covariates, which were measured at study entry. Standardized questionnaires based on the CDC Behavioral Risk Factor Surveillance System were used to collect self-reported demographic, medical, and risk factor data. Participants self-reported their age, sex, and race/ethnicity in response to questions based on the US Census. Smoking status was self-reported as never (reference), current, or former. Physical activity was measured using a questionnaire adapted from the National Health Interview Survey of the National Center for Health Statistics<sup>1</sup>. Moderate alcohol consumption was measured using a modified Block National Cancer Institute Food Frequency questionnaire<sup>2</sup>,

and defined as current drinking of >1 drink per month up to 2 drinks per day as previously described<sup>3</sup>. All medication use was self-reported. Anthropomorphic measurements, including height and weight, were obtained using standardized protocols as previously described<sup>4</sup>. Body mass index (BMI) was calculated as weight in kilograms divided by height in meters squared ( $\text{kg}/\text{m}^2$ ). Diabetes was defined as fasting serum glucose level >126 mg/dL or self-reported history of diabetes<sup>5</sup>. Hypercholesterolemia was defined as total cholesterol of >200 mg/dL or self-reported lipid-lowering medication use. Years between the original NOMAS baseline and MRI visit were computed for each participant.

#### *Rationale for and Calculation of Stabilized Inverse Probability of Selection Weights and Weighted Analysis*

By selecting participants who had regional white matter lesion load data available, we are effectively conditioning on survival to the MRI sub-study and thus introducing selection bias into our estimates<sup>6,7</sup>. This selection process is illustrated by the directed acyclic graph above. By using inverse probability of selection weights<sup>8</sup>, we can estimate the associations of interest in the pseudo-population of original NOMAS cohort participants, i.e. the entire original NOMAS cohort survived to the MRI sub-study.

Predicted probabilities of selection were computed using binary logistic regression models adjusted for the following covariates: age, sex, race/ethnicity, anti-hypertensive medication use, BMI, any physical activity, history of cardiac disease, education, marital status, diabetes mellitus, hypertension, hypercholesterolemia, diabetes medication use, and cholesterol medication use. Stabilized inverse probability of selection weights were calculated as the predicted probability of selection divided by the predicted probability of selection conditional on covariates<sup>8</sup> and truncated at 1% to further stabilize the weights. Weighted analyses were conducted using generalized estimating equations with an independent correlation structure that use robust variance estimators, accounting for the induced within-subject correlation due to the weights<sup>9</sup>.

## Supplemental Tables

**Supplemental Table I.** Comparison of Original NOMAS Cohort Members and Household Members

|                                                | Original Members<br>(N=1025) | Household Members<br>(N=180) | <i>P</i> |
|------------------------------------------------|------------------------------|------------------------------|----------|
| <b>Sociodemographic variables</b>              |                              |                              |          |
| Women, n (%)                                   | 619 (60)                     | 120 (67)                     | 0.111    |
| Age (years), mean (SD)                         | 64 (8)                       | 63 (9)                       | 0.131    |
| Age categories, n (%)                          |                              |                              |          |
| <65 years old                                  | 555 (54)                     | 104 (58)                     | 0.367    |
| 65+ years old                                  | 470 (46)                     | 76 (42)                      |          |
| Race/ethnicity, n (%)                          |                              |                              |          |
| Non-Hispanic White                             | 152 (15)                     | 21 (12)                      | 0.002    |
| Non-Hispanic Black                             | 191 (19)                     | 18 (10)                      |          |
| Hispanic/Latino                                | 657 (64)                     | 140 (78)                     |          |
| Other                                          | 25 (2)                       | 1 (1)                        |          |
| Years between Baseline and MRI, mean (SD)      | 7 (2)                        | 0 (0)                        | <.0001   |
| <b>Clinical variables</b>                      |                              |                              |          |
| Systolic blood pressure, mmHg, mean (SD)       | 141 (20)                     | 132 (17)                     | <.0001   |
| SBP categories                                 |                              |                              |          |
| <120 mmHg, n(%)                                | 104 (10)                     | 37 (21)                      | <.0001   |
| 120-129 mmHg, n(%)                             | 173 (17)                     | 39 (22)                      |          |
| 130-139 mmHg, n(%)                             | 217 (21)                     | 49 (27)                      |          |
| 140+ mmHg, n(%)                                | 531 (52)                     | 55 (31)                      |          |
| Diastolic blood pressure, mmHg, mean (SD)      | 84 (11)                      | 78 (9)                       | <.0001   |
| DBP categories                                 |                              |                              |          |
| <80 mmHg, n(%)                                 | 290 (28)                     | 100 (56)                     | <.0001   |
| 80-90 mmHg, n(%)                               | 381 (37)                     | 60 (33)                      |          |
| 90+ mmHg, n(%)                                 | 354 (35)                     | 20 (11)                      |          |
| Pulse pressure, mmHg, mean (SD)                | 57 (16)                      | 54 (14)                      | 0.015    |
| Mean arterial pressure, mmHg, mean (SD)        | 103 (12)                     | 96 (11)                      | <.0001   |
| Body mass index, kg/m <sup>2</sup> , mean (SD) | 28 (5)                       | 29 (5)                       | 0.006    |
| Anti-hypertensive medication use, n (%)        | 396 (39)                     | 94 (53)                      | 0.001    |
| Diabetes mellitus, n (%)                       | 188 (18)                     | 42 (23)                      | 0.116    |

|                                          |                   |                   |        |
|------------------------------------------|-------------------|-------------------|--------|
| Hypercholesterolemia, n (%)              | 650 (63)          | 131 (73)          | 0.015  |
| <b>Health behaviors</b>                  |                   |                   |        |
| Smoking status, n (%)                    |                   |                   |        |
| Current                                  | 155 (15)          | 27 (15)           |        |
| Former                                   | 386 (38)          | 64 (36)           | 0.843  |
| Never                                    | 484 (47)          | 89 (49)           |        |
| Any physical activity, n (%)             | 578 (56)          | 76 (46)           | 0.011  |
| Moderate alcohol consumption, n (%)      | 398 (39)          | 91 (51)           | 0.003  |
| <b>Brain MRI variables</b>               |                   |                   |        |
| Total intracranial volume, mL, mean (SD) | 1152 (123)        | 1146 (117)        | 0.544  |
| Total WMHV, mL, median (q1, q3)          | 4.39 (2.56, 9.04) | 2.87 (1.74, 5.31) | <.0001 |
| Regional WMHV, mL, median (q1, q3)       |                   |                   |        |
| Frontal                                  | 0.83 (0.59, 1.31) | 0.83 (0.63, 1.13) | 0.925  |
| Temporal                                 | 0.31 (0.23, 0.42) | 0.33 (0.26, 0.42) | 0.054  |
| Parietal                                 | 0.29 (0.19, 0.48) | 0.25 (0.17, 0.37) | 0.013  |
| Occipital                                | 0.08 (0.05, 0.14) | 0.07 (0.05, 0.13) | 0.377  |
| Anterior periventricular                 | 1.47 (0.72, 3.18) | 0.97 (0.54, 1.81) | <.0001 |
| Posterior periventricular                | 2.01 (1.13, 3.96) | 1.48 (0.91, 2.58) | <.0001 |

P-values obtained from chi-squared tests for categorical variables, one-way ANOVAs for normally distributed variables, and Wilcoxon rank-sum test for non-normally distributed variables.

**Supplemental Table II.** Re-Analysis of the Association between Systolic and Diastolic Blood Pressure Levels with Regional White Matter Lesion Load, Weighted by Stabilized Inverse Probability of Selection Weights, In Subsample of Participants Recruited from the Original NOMAS Cohort (N=1022\*)

| Systolic Blood Pressure Levels |         |         |        |       | Diastolic Blood Pressure Levels  |         |         |         |        |
|--------------------------------|---------|---------|--------|-------|----------------------------------|---------|---------|---------|--------|
|                                | beta    | LCL     | UCL    | P     |                                  | beta    | LCL     | UCL     | P      |
| <b>Frontal</b>                 |         |         |        |       | <b>Frontal</b>                   |         |         |         |        |
| <120 mmHg                      | -17.276 | -31.423 | -0.210 | 0.047 | <80 mmHg                         | -19.865 | -30.768 | -7.245  | 0.003  |
| 120-129 mmHg                   | -5.178  | -16.960 | 8.275  | 0.432 | 80-90 mmHg                       | -11.040 | -21.542 | 0.868   | 0.068  |
| 130-139 mmHg                   | -8.114  | -19.406 | 4.762  | 0.206 |                                  |         |         |         |        |
| <b>Parietal</b>                |         |         |        |       | <b>Parietal</b>                  |         |         |         |        |
| <120 mmHg                      | -14.057 | -26.858 | 0.985  | 0.066 | <80 mmHg                         | -18.820 | -29.162 | -6.968  | 0.003  |
| 120-129 mmHg                   | 1.522   | -10.779 | 15.519 | 0.819 | 80-90 mmHg                       | -6.767  | -16.708 | 4.360   | 0.223  |
| 130-139 mmHg                   | 2.403   | -9.278  | 15.587 | 0.701 |                                  |         |         |         |        |
| <b>Temporal</b>                |         |         |        |       | <b>Temporal</b>                  |         |         |         |        |
| <120 mmHg                      | -8.540  | -22.315 | 7.677  | 0.284 | <80 mmHg                         | -4.252  | -13.884 | 6.456   | 0.422  |
| 120-129 mmHg                   | -1.068  | -10.609 | 9.490  | 0.836 | 80-90 mmHg                       | 2.480   | -6.490  | 12.312  | 0.600  |
| 130-139 mmHg                   | -5.813  | -14.371 | 3.601  | 0.218 |                                  |         |         |         |        |
| <b>Anterior PV</b>             |         |         |        |       | <b>Anterior PV</b>               |         |         |         |        |
| <120 mmHg                      | -12.212 | -29.438 | 9.220  | 0.243 | <80 mmHg                         | -25.149 | -36.171 | -12.222 | <0.001 |
| 120-129 mmHg                   | -10.652 | -25.281 | 6.841  | 0.217 | 80-90 mmHg                       | -14.257 | -25.290 | -1.595  | 0.029  |
| 130-139 mmHg                   | -0.371  | -13.930 | 15.325 | 0.960 |                                  |         |         |         |        |
| <b>Posterior PV</b>            |         |         |        |       | <b>Posterior PV</b>              |         |         |         |        |
| <120 mmHg                      | -12.785 | -26.705 | 3.779  | 0.123 | <80 mmHg                         | -19.608 | -30.068 | -7.583  | 0.002  |
| 120-129 mmHg                   | 3.061   | -10.164 | 18.231 | 0.667 | 80-90 mmHg                       | -15.239 | -24.965 | -4.253  | 0.008  |
| 130-139 mmHg                   | 10.553  | -3.524  | 26.684 | 0.149 |                                  |         |         |         |        |
| <b>Occipital</b>               |         |         |        |       | <b>Occipital</b>                 |         |         |         |        |
| <120 mmHg                      | 9.434   | -5.429  | 26.633 | 0.226 | <80 mmHg                         | -2.145  | -9.897  | 6.274   | 0.607  |
| 120-129 mmHg                   | -4.549  | -12.113 | 3.666  | 0.269 | 80-90 mmHg                       | -6.784  | -12.561 | -0.626  | 0.031  |
| 130-139 mmHg                   | -1.497  | -8.765  | 6.349  | 0.700 |                                  |         |         |         |        |
| Pulse Pressure (z-score)       |         |         |        |       | Mean Arterial Pressure (z-score) |         |         |         |        |
|                                | beta    | LCL     | UCL    | P     |                                  | beta    | LCL     | UCL     | P      |
| <b>Frontal</b>                 | -1.188  | -6.659  | 4.603  | 0.681 | <b>Frontal</b>                   | 10.864  | 4.586   | 17.520  | 0.001  |
| <b>Parietal</b>                | -2.474  | -7.026  | 2.300  | 0.304 | <b>Parietal</b>                  | 8.697   | 3.362   | 14.307  | 0.001  |
| <b>Temporal</b>                | 2.185   | -2.267  | 6.840  | 0.342 | <b>Temporal</b>                  | 3.535   | -1.011  | 8.291   | 0.129  |

|                     |        |        |       |       |                     |        |        |        |        |
|---------------------|--------|--------|-------|-------|---------------------|--------|--------|--------|--------|
| <b>Anterior PV</b>  | 0.119  | -5.940 | 6.569 | 0.970 | <b>Anterior PV</b>  | 13.992 | 6.439  | 22.081 | <0.001 |
| <b>Posterior PV</b> | -0.972 | -5.948 | 4.268 | 0.711 | <b>Posterior PV</b> | 11.022 | 5.157  | 17.214 | <0.001 |
| <b>Occipital</b>    | -0.564 | -3.586 | 2.553 | 0.719 | <b>Occipital</b>    | 1.160  | -2.378 | 4.825  | 0.526  |

\*3 missing weights due to missing covariates. Generalized estimating equations used to generate estimates and robust standard errors. Beta coefficients and 95% confidence are transformed such that they represent the expected percent change in WMHV for each category, compared to SBP 140+ mmHg or DBP 90+ mmHg. Model adjusted for age at study entry, sex, race/ethnicity, total intracranial volume (TIV), region (ref=occipital), anti-hypertensive medication use, baseline BMI, baseline smoking status, baseline physical activity, baseline moderate alcohol consumption, years between baseline and MRI, region\*age, region\*sex, region\*race/ethnicity, region\*TIV, region\* anti-hypertensive medication use, region\*smoking status, and region\*years between baseline and MRI.

**Supplemental Table III.** Re-Analysis of the Association between Systolic and Diastolic Blood Pressure Levels with Regional White Matter Lesion Load, Among Original NOMAS Members (N=1025)

| <b>Systolic Blood Pressure Levels</b> |         |         |        |       | <b>Diastolic Blood Pressure Levels</b>  |         |         |         |       |
|---------------------------------------|---------|---------|--------|-------|-----------------------------------------|---------|---------|---------|-------|
|                                       | beta    | LCL     | UCL    | P     |                                         | beta    | LCL     | UCL     | P     |
| <b>Frontal</b>                        |         |         |        |       | <b>Frontal</b>                          |         |         |         |       |
| <120 mmHg                             | -11.675 | -24.204 | 2.925  | 0.112 | <80 mmHg                                | -11.998 | -21.337 | -1.550  | 0.026 |
| 120-129 mmHg                          | -5.657  | -16.726 | 6.885  | 0.360 | 80-90 mmHg                              | -3.255  | -12.495 | 6.960   | 0.518 |
| 130-139 mmHg                          | -6.008  | -15.843 | 4.977  | 0.272 |                                         |         |         |         |       |
| <b>Parietal</b>                       |         |         |        |       | <b>Parietal</b>                         |         |         |         |       |
| <120 mmHg                             | -9.157  | -22.043 | 5.858  | 0.218 | <80 mmHg                                | -10.581 | -20.070 | 0.035   | 0.051 |
| 120-129 mmHg                          | 0.157   | -11.595 | 13.471 | 0.980 | 80-90 mmHg                              | -0.528  | -10.028 | 9.975   | 0.918 |
| 130-139 mmHg                          | 2.876   | -7.889  | 14.899 | 0.615 |                                         |         |         |         |       |
| <b>Temporal</b>                       |         |         |        |       | <b>Temporal</b>                         |         |         |         |       |
| <120 mmHg                             | -5.797  | -19.160 | 9.774  | 0.444 | <80 mmHg                                | -1.112  | -11.606 | 10.628  | 0.845 |
| 120-129 mmHg                          | -2.318  | -13.780 | 10.667 | 0.713 | 80-90 mmHg                              | 5.030   | -5.001  | 16.120  | 0.338 |
| 130-139 mmHg                          | -4.632  | -14.611 | 6.513  | 0.400 |                                         |         |         |         |       |
| <b>Anterior PV</b>                    |         |         |        |       | <b>Anterior PV</b>                      |         |         |         |       |
| <120 mmHg                             | -7.758  | -20.843 | 7.489  | 0.301 | <80 mmHg                                | -22.971 | -31.146 | -13.827 | 0.000 |
| 120-129 mmHg                          | -9.339  | -19.977 | 2.712  | 0.124 | 80-90 mmHg                              | -12.561 | -20.912 | -3.328  | 0.009 |
| 130-139 mmHg                          | -3.182  | -13.313 | 8.133  | 0.566 |                                         |         |         |         |       |
| <b>Posterior PV</b>                   |         |         |        |       | <b>Posterior PV</b>                     |         |         |         |       |
| <120 mmHg                             | -9.227  | -22.103 | 5.777  | 0.215 | <80 mmHg                                | -15.207 | -24.205 | -5.140  | 0.004 |
| 120-129 mmHg                          | 0.264   | -11.501 | 13.592 | 0.967 | 80-90 mmHg                              | -9.773  | -18.390 | -0.245  | 0.045 |
| 130-139 mmHg                          | 4.178   | -6.723  | 16.353 | 0.468 |                                         |         |         |         |       |
| <b>Occipital</b>                      |         |         |        |       | <b>Occipital</b>                        |         |         |         |       |
| <120 mmHg                             | 4.111   | -9.601  | 19.902 | 0.576 | <80 mmHg                                | -1.245  | -10.979 | 9.553   | 0.813 |
| 120-129 mmHg                          | -2.864  | -13.409 | 8.965  | 0.620 | 80-90 mmHg                              | -6.124  | -14.381 | 2.931   | 0.179 |
| 130-139 mmHg                          | -1.101  | -10.649 | 9.467  | 0.831 |                                         |         |         |         |       |
| <b>Pulse Pressure (z-score)</b>       |         |         |        |       | <b>Mean Arterial Pressure (z-score)</b> |         |         |         |       |
|                                       | beta    | LCL     | UCL    | P     |                                         | beta    | LCL     | UCL     | P     |
| <b>Frontal</b>                        | 1.097   | -3.407  | 5.811  | 0.639 | <b>Frontal</b>                          | 6.857   | 2.110   | 11.823  | 0.004 |
| <b>Parietal</b>                       | -0.900  | -5.315  | 3.721  | 0.697 | <b>Parietal</b>                         | 5.034   | 0.368   | 9.916   | 0.034 |
| <b>Temporal</b>                       | 2.320   | -2.239  | 7.091  | 0.324 | <b>Temporal</b>                         | 1.741   | -2.778  | 6.471   | 0.456 |
| <b>Anterior PV</b>                    | 0.627   | -3.856  | 5.319  | 0.788 | <b>Anterior PV</b>                      | 11.952  | 6.979   | 17.156  | 0.000 |



|                     |        |        |       |       |                     |       |        |        |       |
|---------------------|--------|--------|-------|-------|---------------------|-------|--------|--------|-------|
| <b>Posterior PV</b> | 0.271  | -4.196 | 4.947 | 0.907 | <b>Posterior PV</b> | 8.213 | 3.407  | 13.243 | 0.001 |
| <b>Occipital</b>    | -0.310 | -4.397 | 3.952 | 0.885 | <b>Occipital</b>    | 1.453 | -2.703 | 5.787  | 0.499 |

Beta coefficients and 95% confidence are transformed such that they represent the expected percent change in WMHV for each category, compared to SBP 140+ mmHg or DBP 90+ mmHg. Model adjusted for age at study entry, sex, race/ethnicity, total intracranial volume (TIV), region (ref=occipital), anti-hypertensive medication use, baseline BMI, baseline smoking status, baseline physical activity, baseline moderate alcohol consumption, years between baseline and MRI, region\*age, region\*sex, region\*race/ethnicity, region\*TIV, region\* anti-hypertensive medication use, region\*smoking status, and region\*years between baseline and MRI.

**Supplemental Figure I.** Segmentation of Regional Lobar WMHV by FSL. Credit: Noam Alperin, PhD.

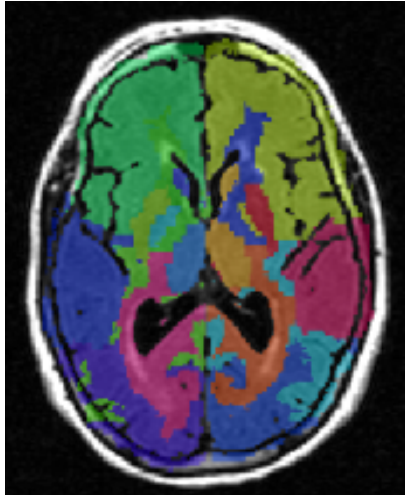

## References

1. Moss AJ, Parsons VL. Current estimates from the National Health Interview Survey. United States, 1985. *Vital Health Stat.* 10. 1986;i-iv, 1-182.
2. Block G, Hartman AM, Dresser CM, Carroll MD, Gannon J, Gardner L. A data-based approach to diet questionnaire design and testing. *Am. J. Epidemiol.* 1986;124:453–469.
3. Elkind MS, Sciacca R, Boden-Albala B, Rundek T, Paik MC, Sacco RL. Moderate alcohol consumption reduces risk of ischemic stroke: the Northern Manhattan Study. *Stroke* [Internet]. 2006;37:13–19. Available from: <http://www.ncbi.nlm.nih.gov/pubmed/16306464>
4. Suk SH, Sacco RL, Boden-Albala B, Cheun JF, Pittman JG, Elkind MS, et al. Abdominal obesity and risk of ischemic stroke: the Northern Manhattan Stroke Study. *Stroke.* 2003;34:1586–1592.
5. Banerjee C, Moon YP, Paik MC, Rundek T, Mora-McLaughlin C, Vieira JR, et al. Duration of diabetes and risk of ischemic stroke: the Northern Manhattan Study. *Stroke.* 2012;43:1212–1217.
6. Hernan MA, Hernandez-Diaz S, Robins JM. A structural approach to selection bias. *Epidemiology.* 2004;15:615–625.
7. Ganguli M, Lee C-W, Hughes T, Snitz BE, Jakubcak J, Duara R, et al. Who wants a free brain scan? Assessing and correcting for recruitment biases in a population-based sMRI pilot study. *Brain Imaging Behav.* [Internet]. 2015 [cited 2018 Jun 29];9:204–12. Available from: <http://link.springer.com/10.1007/s11682-014-9297-9>
8. Cole SR, Hernan MA. Constructing inverse probability weights for marginal structural models. *Am J Epidemiol* [Internet]. 2008;168:656–664. Available from: <https://www.ncbi.nlm.nih.gov/pmc/articles/PMC2732954/pdf/kwn164.pdf>
9. Hernan MA, Brumback B, Robins JM. Marginal structural models to estimate the causal effect of zidovudine on the survival of HIV-positive men. *Epidemiology.* 2000;11:561–570.
